# Supplementary material for: Discriminatory behavior of a rhodamine 6G decorated mesoporous silica based multiple cation sensor towards Cu2+ and Hg2+vis-à-vis Al3+, Cr3+ and Fe3+: selective removal of Cu2+ and Hg2+ from aqueous media
Source: Royal Society of Chemistry journal article supplement (doi:10.1039/d1dt01542g), 2021-01-01
Supplement: d1dt01542g1.pdf [file d1dt01542g1.pdf]

## Supplementary Information

### **Discriminatory behavior of a rhodamine 6G decorated mesoporous silica based multiple cation sensor towards $\text{Cu}^{2+}$ and $\text{Hg}^{2+}$ *vis-à-vis* $\text{Al}^{3+}$ , $\text{Cr}^{3+}$ and $\text{Fe}^{3+}$ : Selective removal of $\text{Cu}^{2+}$ and $\text{Hg}^{2+}$ from aqueous medium**

Debdas Singha,<sup>a</sup> Ananya Pal,<sup>a</sup> Hiroshi Uyama,<sup>b</sup> Partha Roy,<sup>c</sup> Mahasweta Nandi<sup>\*,a</sup>

*<sup>a</sup>Integrated Science Education and Research Centre, Siksha Bhavana, Visva-Bharati University,  
Santiniketan 731 235, India*

*Email: mahasweta.nandi@visva-bharati.ac.in*

*<sup>b</sup>Department of Applied Chemistry, Graduate School of Engineering, Osaka University, 2-1 Yamadaoka,  
Suita, Osaka, 565-0871, Japan*

*<sup>c</sup>Department of Chemistry, Jadavpur University, Kolkata 700032, India*

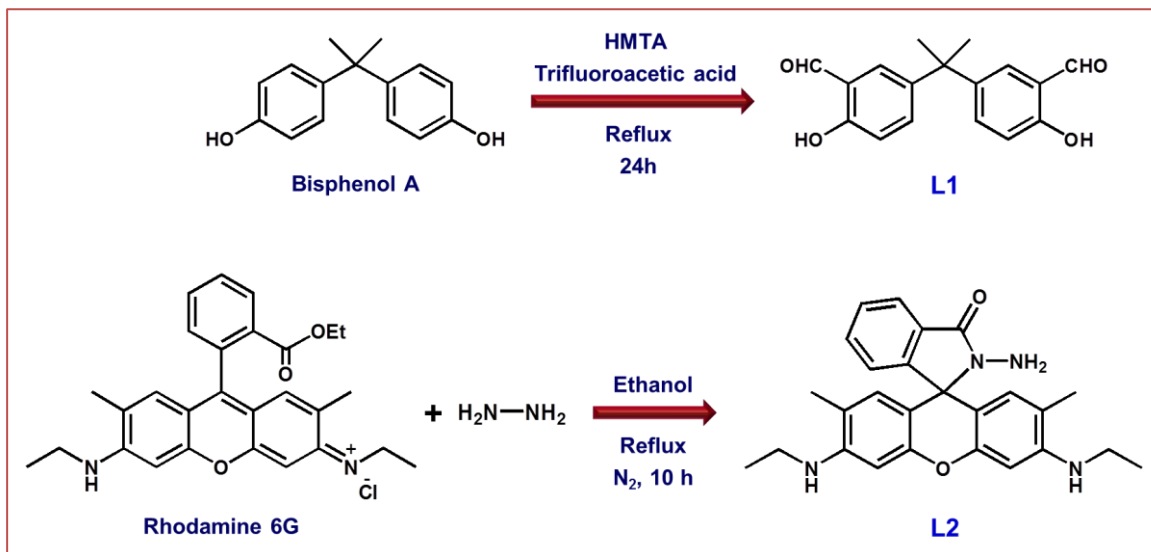

**Scheme S1.** Syntheses of **L1** and **L2**

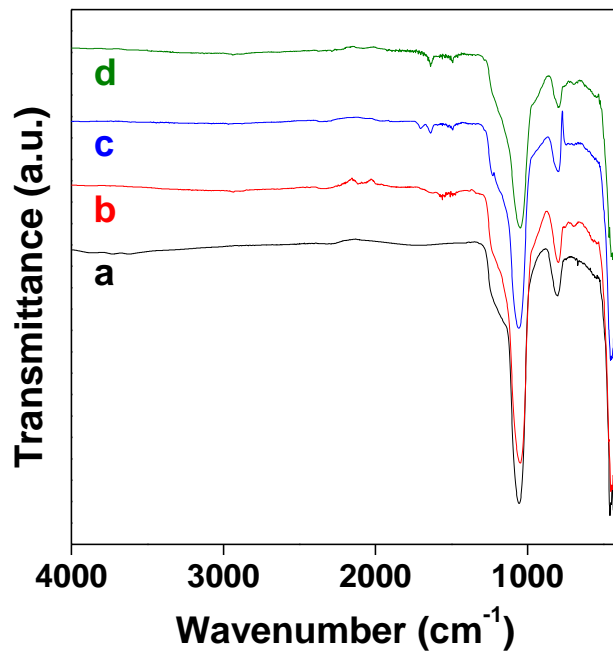

**Fig. S1.** FT-IR spectra of (a) mesoporous silica (MS), (b) 3-APTES-FMS, (c) CHO-FMS and (d) R6FMS.

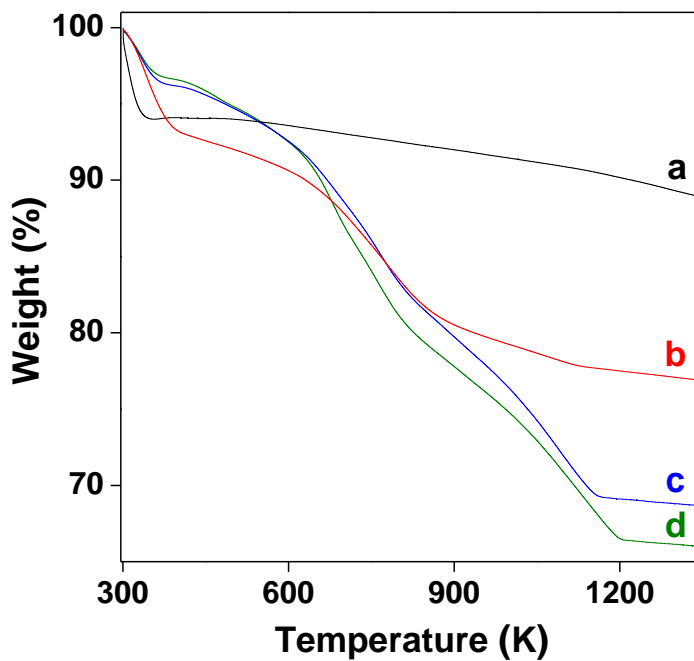

**Fig. S2.** Thermogravimetric analysis of (a) mesoporous silica (MS), (b) 3-APTES-FMS, (c) CHO-FMS and (d) R6FMS.

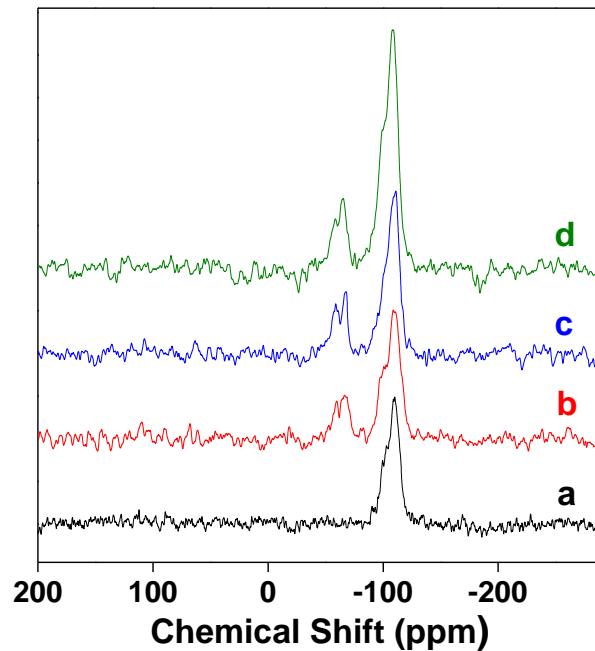

**Fig. S3.** Solid state  $^{29}\text{Si}$  MAS NMR spectra of (a) mesoporous silica (MS), (b) 3-APTES-FMS, (c) CHO-FMS and (d) R6FMS.

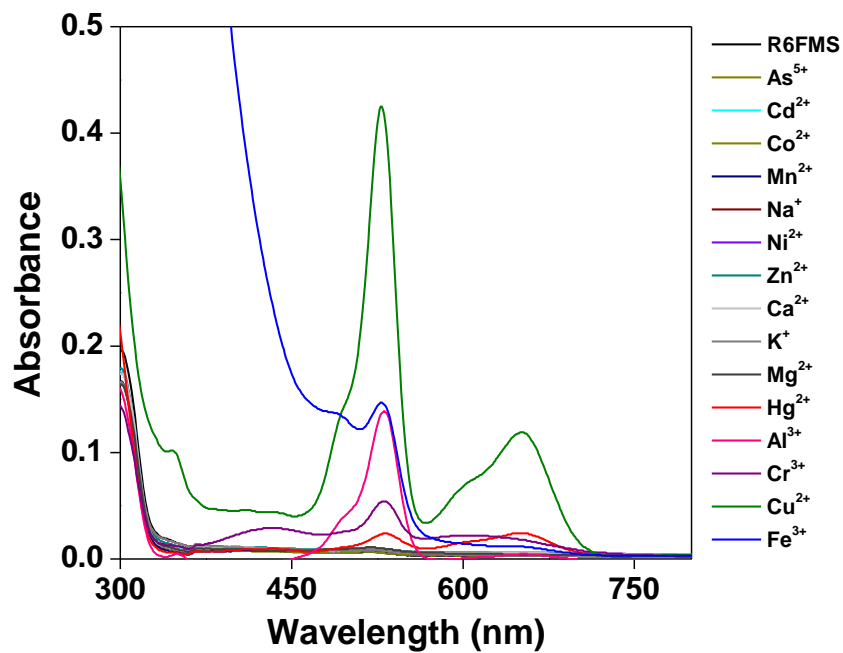

**Fig. S4.** Absorption spectra of R6FMS in the presence of 800  $\mu\text{M}$  of different metal ions (for  $\text{Cu}^{2+}$ : 500  $\mu\text{M}$ ) in ethanol at 298 K ( $l = 1$  cm).

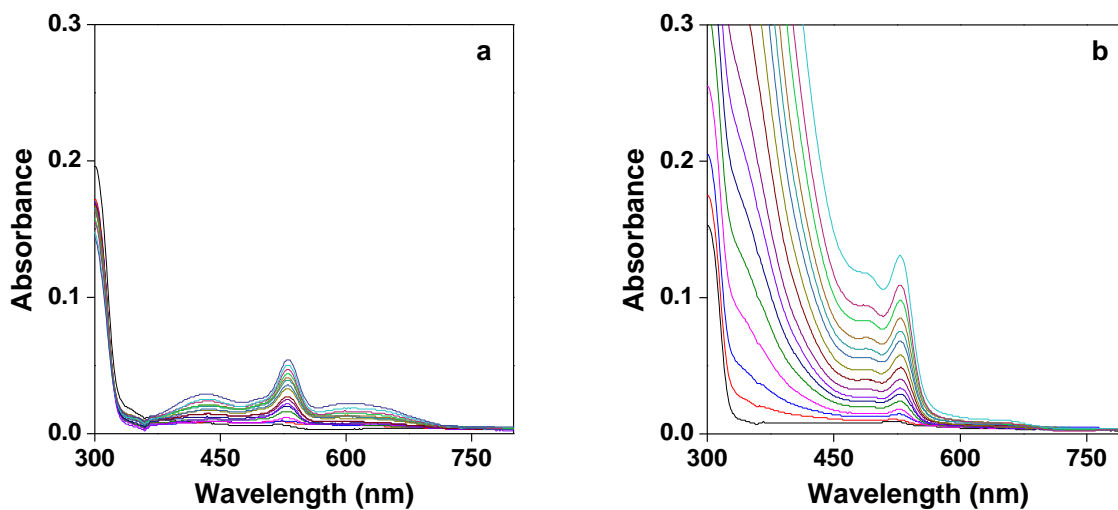

**Fig. S5.** Absorption spectra of **R6FMS** in the presence of (0-800 μM) (a) Cr<sup>3+</sup> and (b) Fe<sup>3+</sup> in ethanol at 298 K ( $l = 1$  cm).

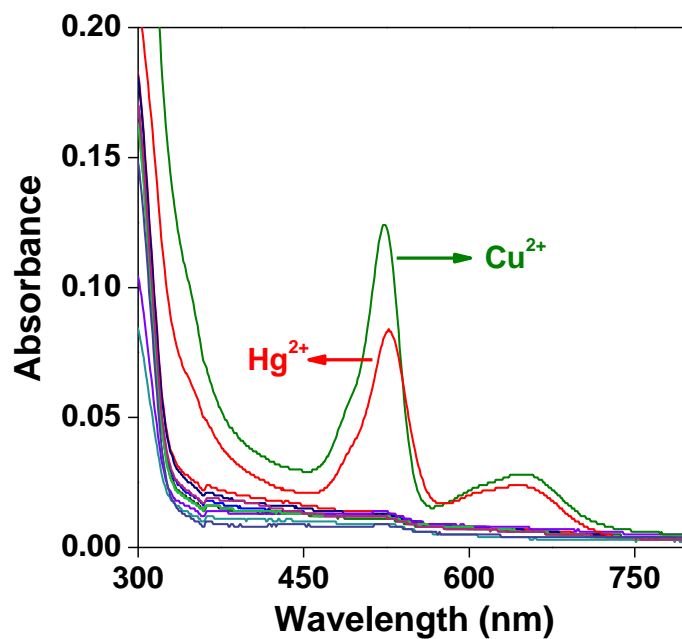

**Fig. S6.** Absorption spectra of **R6FMS** in the presence 800 μM concentration of different metal ions in 10 mM HEPES buffer in water/acetonitrile = 14:1 (v/v) (pH 7.2) at 298 K ( $l = 1$  cm).

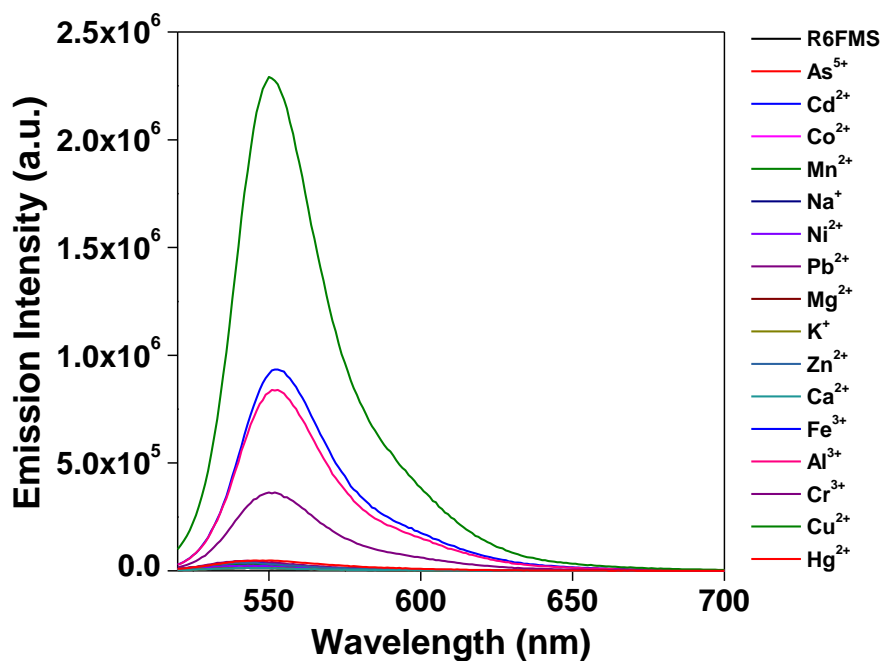

**Fig. S7.** Fluorescence spectra of **R6FMS** in the presence 800 μM of different metal ions in ethanol at 298 K.

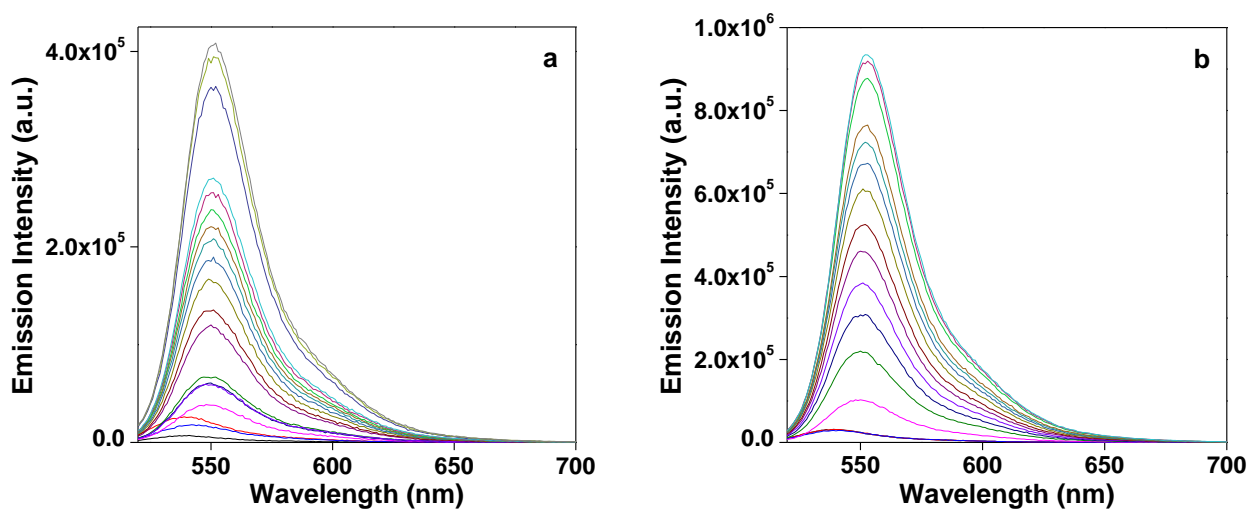

**Fig. S8.** Fluorescence spectra of **R6FMS** in the presence of different concentrations of (a) Cr<sup>3+</sup> (0-800 μM) and (b) Fe<sup>3+</sup> (0-800 μM) in ethanol at 298 K.

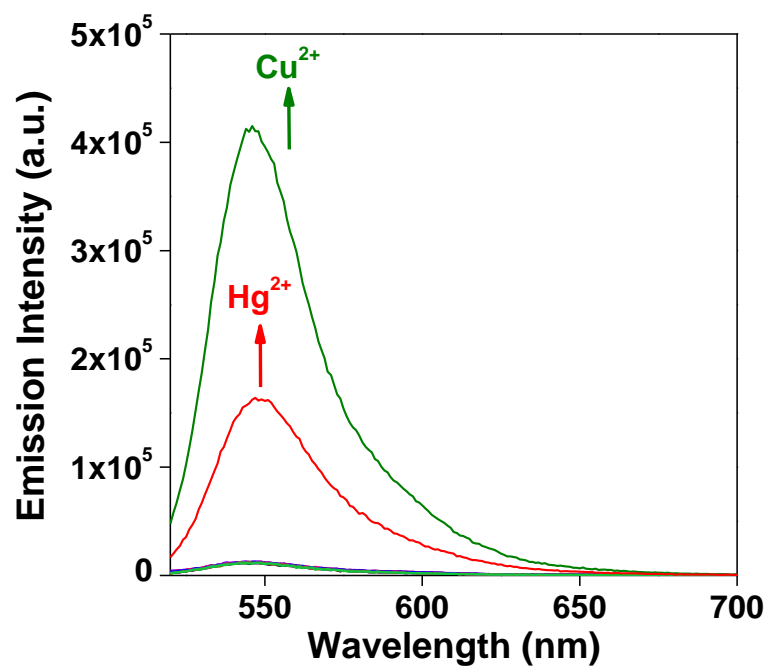

**Fig. S9.** Fluorescence spectra of **R6FMS** in the presence of 800  $\mu\text{M}$  of all metal ions in 10 mM HEPES buffer in water/acetonitrile = 14:1 (v/v) (pH 7.2) at 298 K.

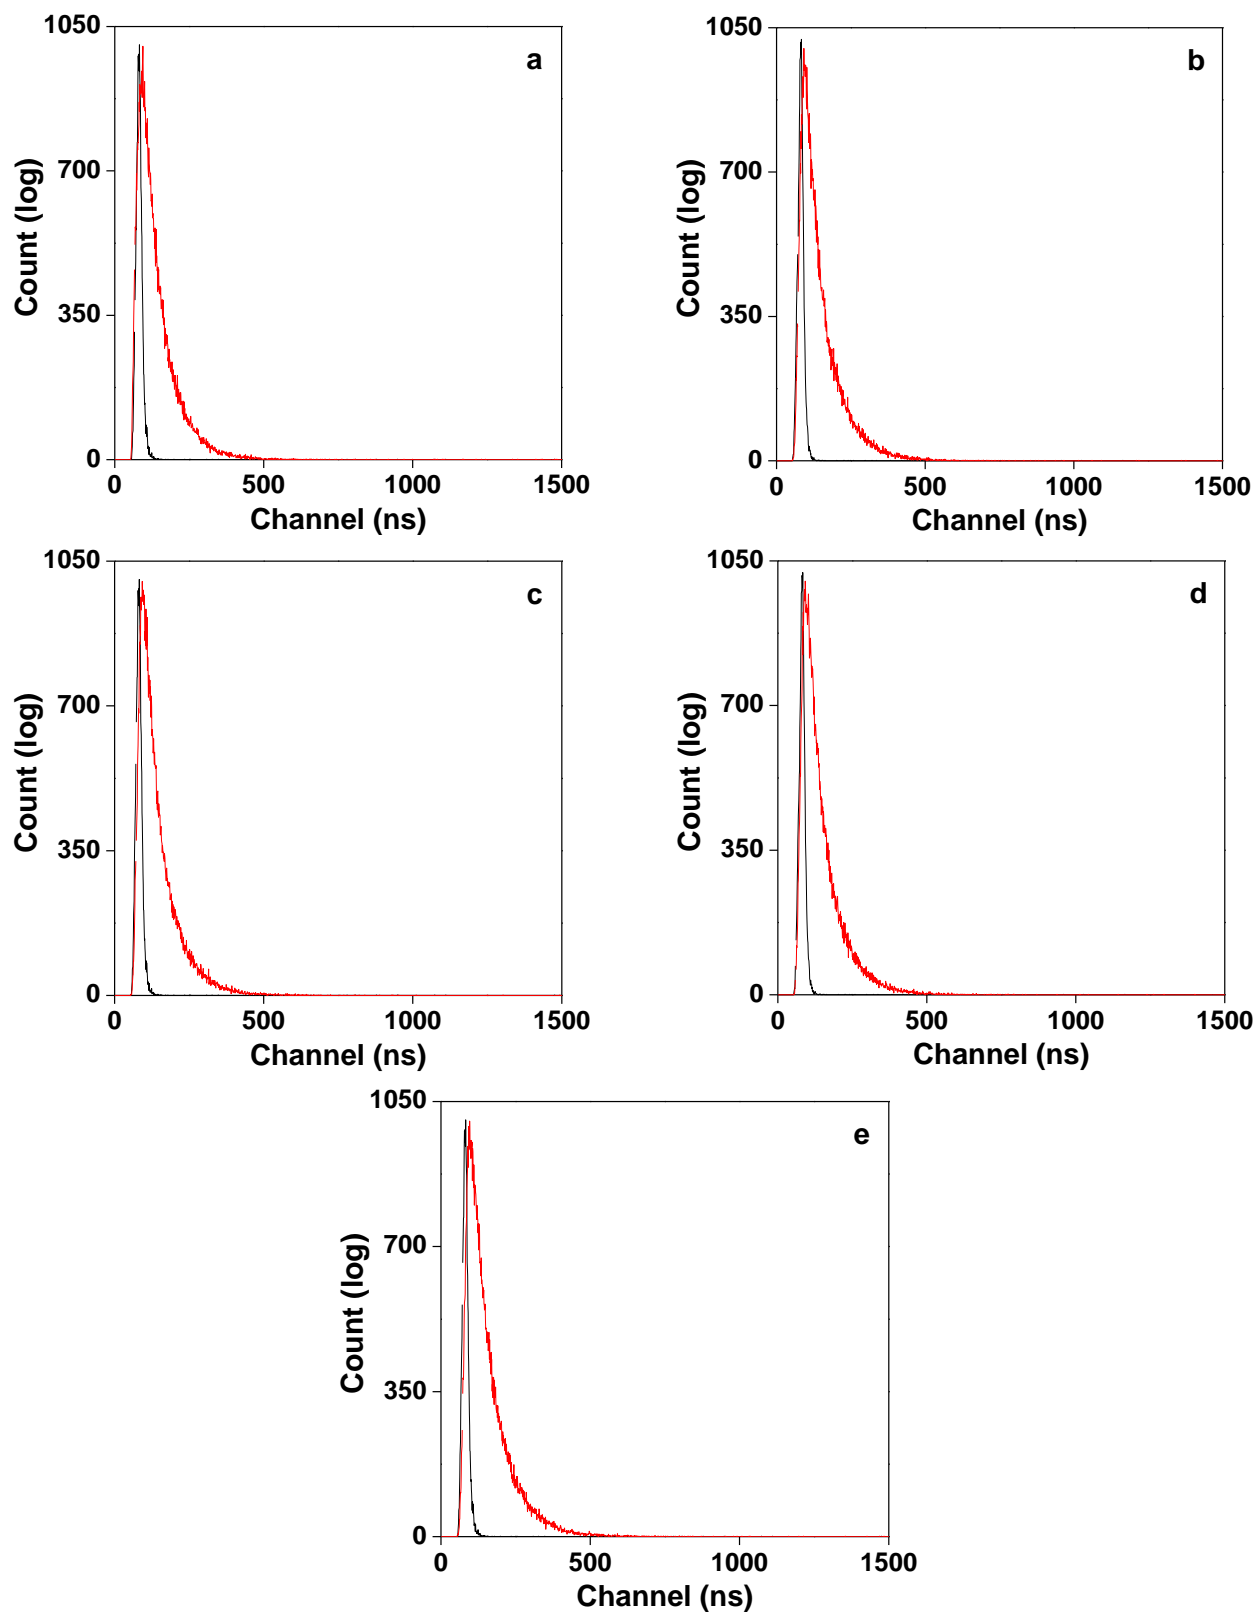

**Fig. S10.** Excited state fluorescence decay behavior of (a) **R6FMS** and its complex with (b)  $\text{Al}^{3+}$ , (c)  $\text{Cr}^{3+}$ , (d)  $\text{Fe}^{3+}$  and (e)  $\text{Cu}^{2+}$  ions in ethanol at 298 K.



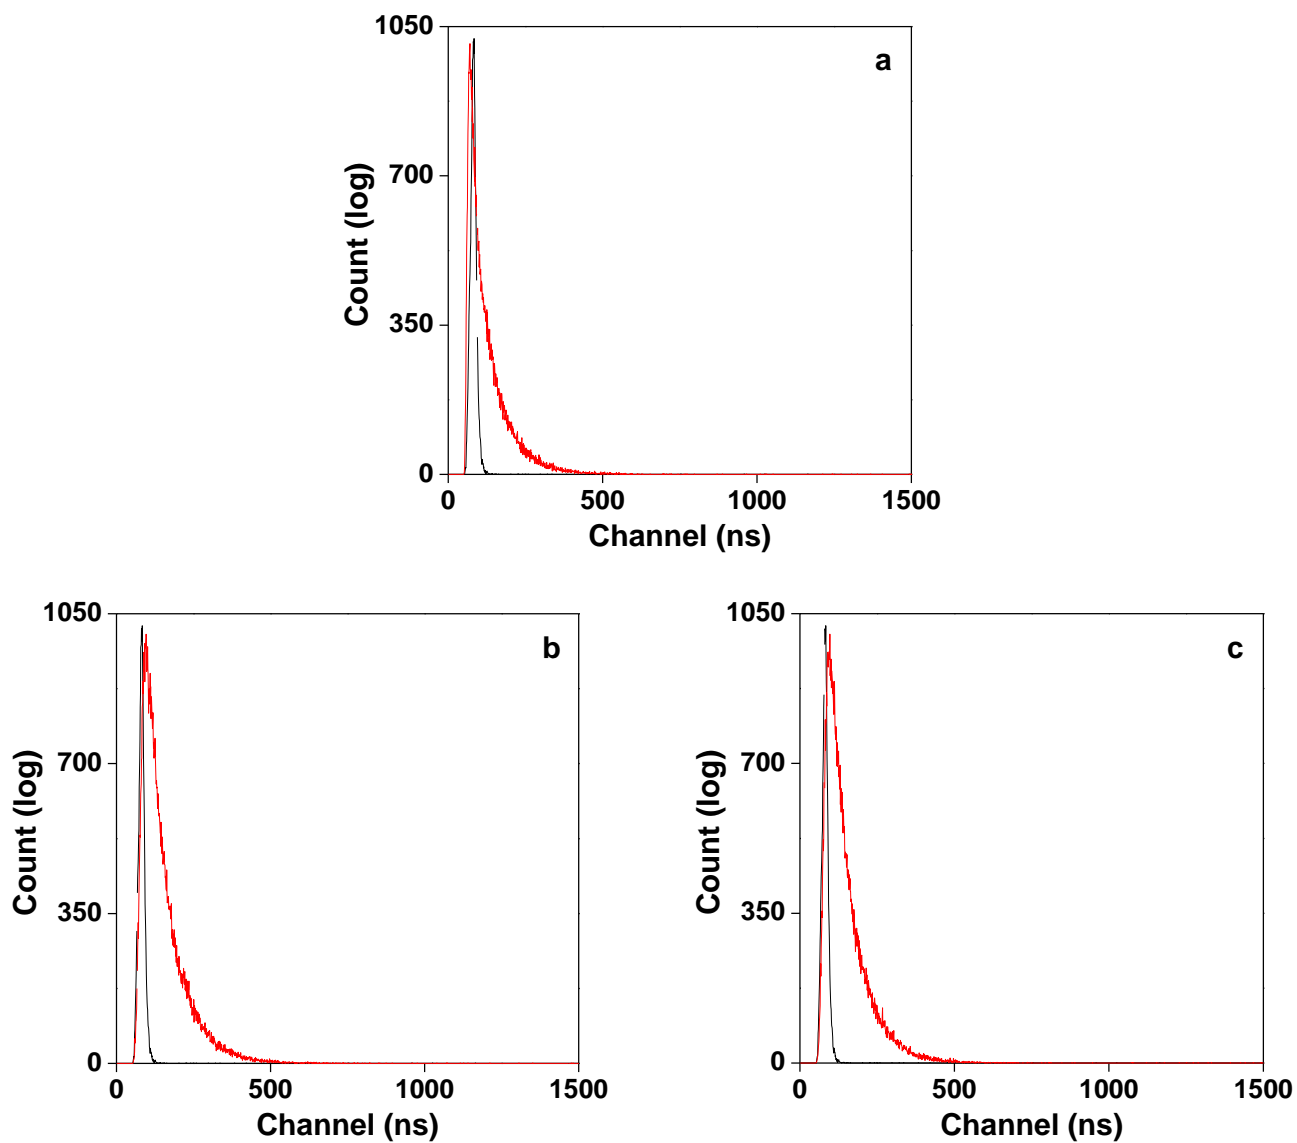

**Fig. S11.** Excited state fluorescence decay behavior of (a) **R6FMS** and its complex with (a)  $\text{Cu}^{2+}$  and (c)  $\text{Hg}^{2+}$  ions in 10 mM HEPES buffer in water/acetonitrile = 14:1 (v/v) (pH 7.2) at 298 K.

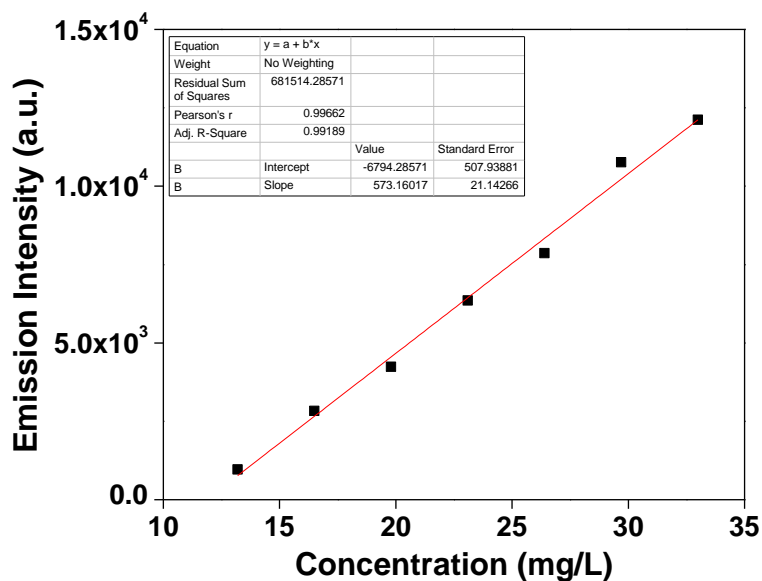

Fig. S12. Determination of Sb1 of the blank, **R6FMS** in ethanol at 298 K.

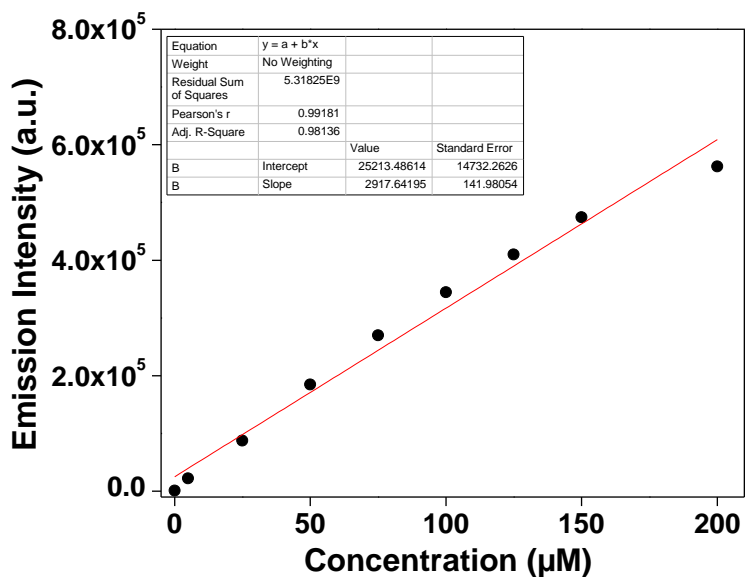

Fig. S13. Linear dynamic plot of F.I. (at 552 nm) vs.  $[Al^{3+}]$  in ethanol for the determination of S (slope).

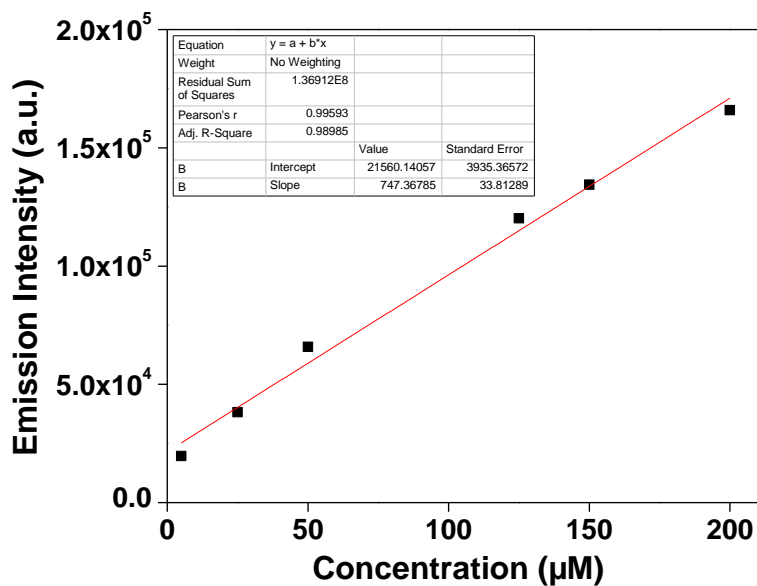

Fig. S14. Linear dynamic plot of F.I. (at 552 nm) vs.  $[\text{Cr}^{3+}]$  in ethanol for the determination of S (slope).

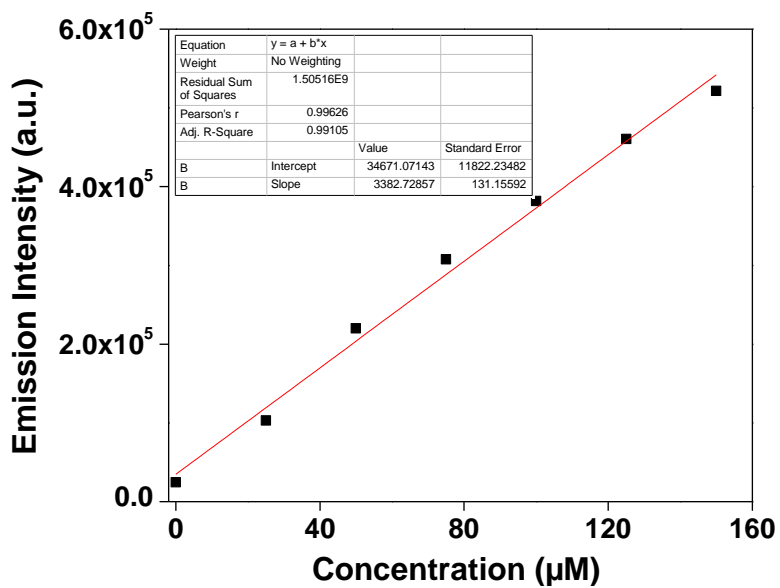

Fig. S15. Linear dynamic plot of F.I. (at 552 nm) vs.  $[\text{Fe}^{3+}]$  in ethanol for the determination of S (slope).

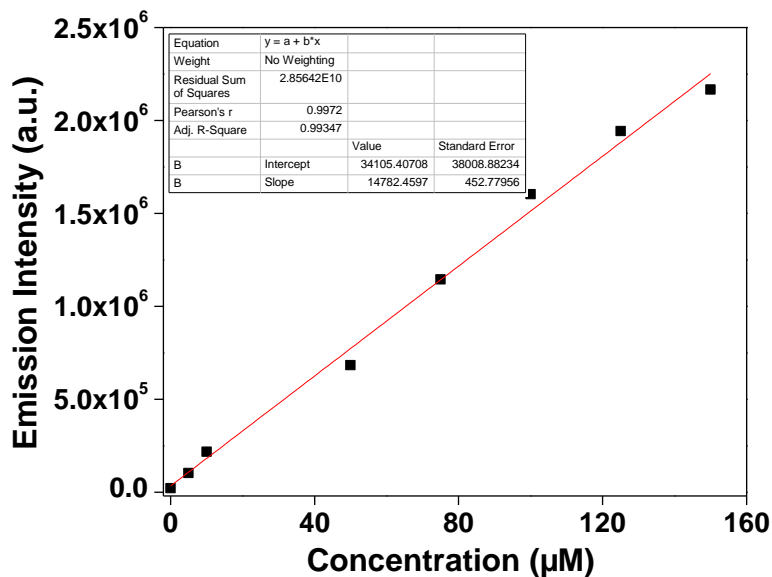

**Fig. S16.** Linear dynamic plot of F.I. (at 552 nm) vs.  $[\text{Cu}^{2+}]$  in ethanol for the determination of S (slope).

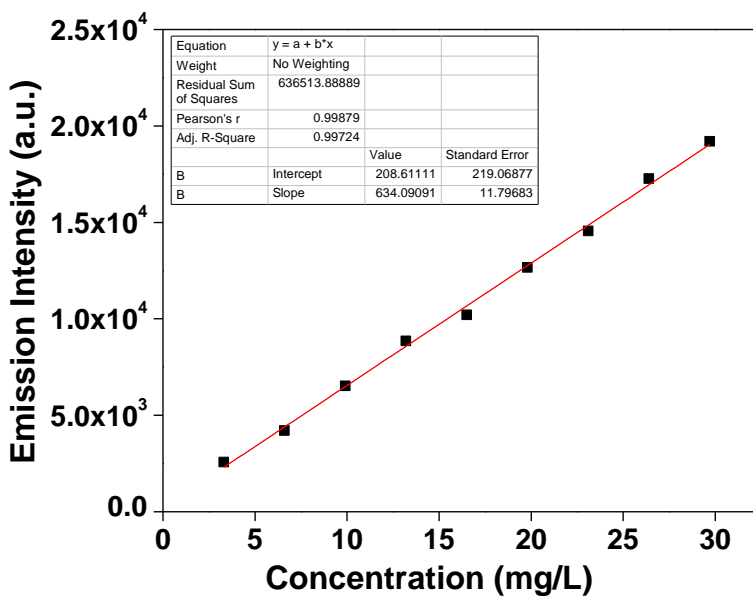

**Fig. S17.** Determination of Sb1 of the blank, **R6FMS** in water/acetonitrile (14:1, v/v) (pH 7.2, HEPES buffer) at 298 K.

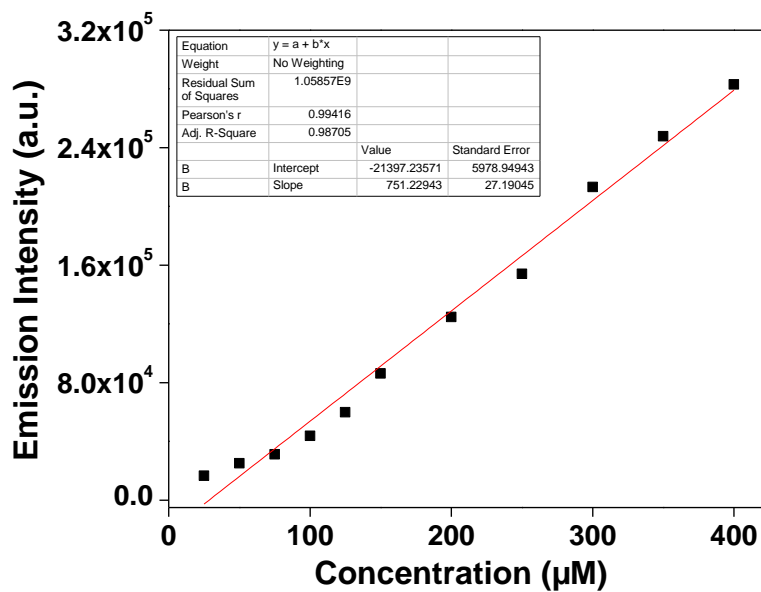

**Fig. S18.** Linear dynamic plot of F.I. (at 552 nm) vs.  $[Cu^{2+}]$  for the determination of S (slope) in water/acetonitrile (14:1, v/v) (pH 7.2, HEPES buffer).

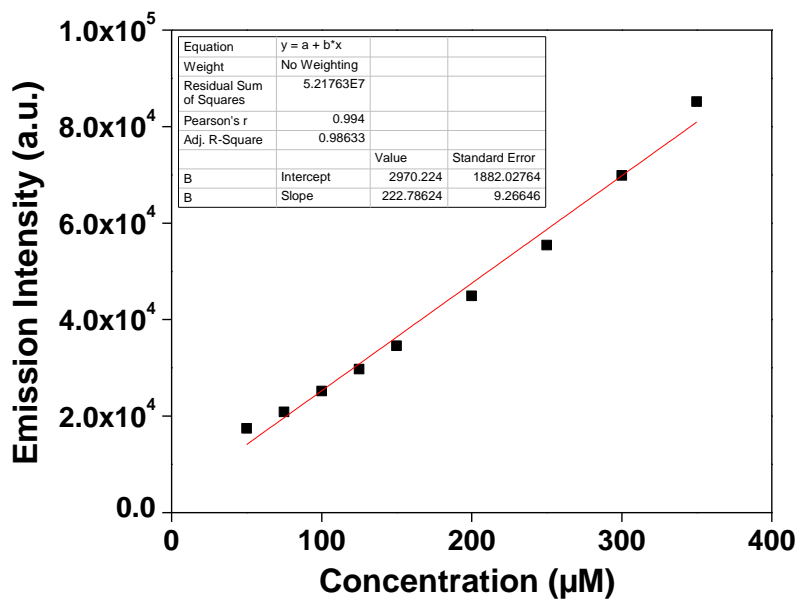

**Fig. S19.** Linear dynamic plot of F.I. (at 552 nm) vs.  $[Hg^{2+}]$  for the determination of S (slope) in water/acetonitrile (14:1, v/v) (pH 7.2, HEPES buffer).

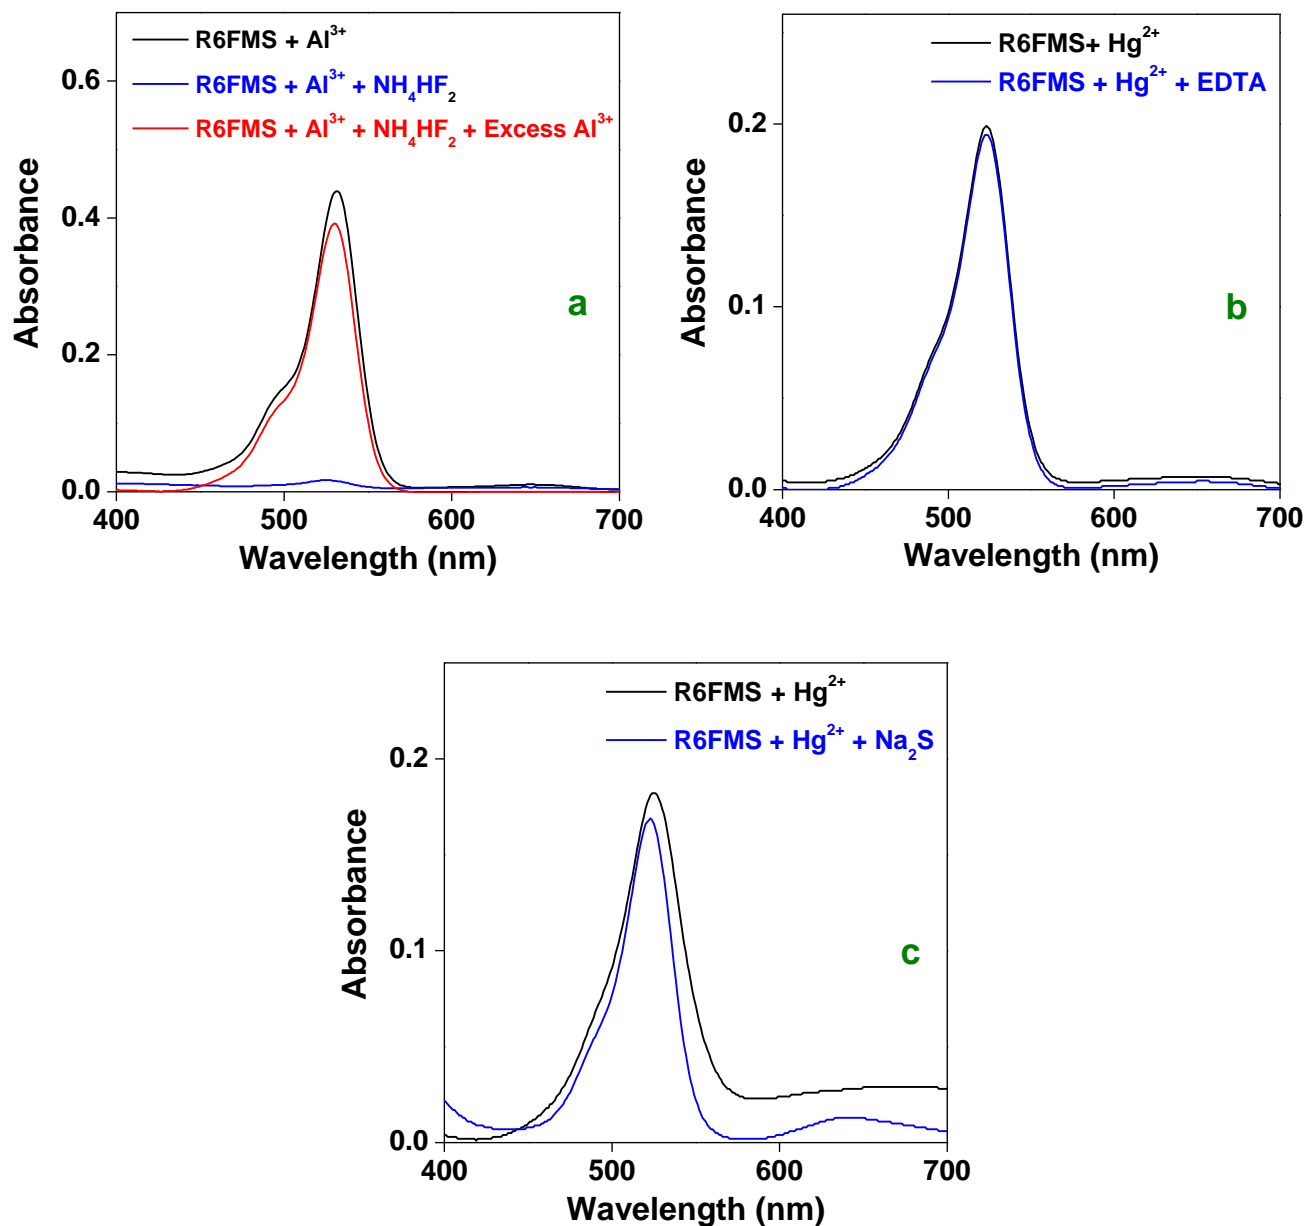

**Fig. S20.** Absorbance of **R6FMS** in the presence of  $\text{Al}^{3+}$  and  $\text{Hg}^{2+}$  with different complexing agents. (a) Reversibility test of  $\text{Al}^{3+}$  binding with **R6FMS** in the presence  $\text{F}^-$  ion in ethanol indicating reversible binding nature of aluminum, (b) Reversibility test of  $\text{Hg}^{2+}$  binding with **R6FMS** in the presence of  $\text{Na}_2\text{-EDTA}$  in water/acetonitrile (14:1, v/v) (pH 7.2, HEPES buffer) and (c) Reversibility test of  $\text{Hg}^{2+}$  binding with **R6FMS** in the presence of  $\text{Na}_2\text{S}$  in water/acetonitrile (14:1, v/v) (pH 7.2, HEPES buffer). Both the tests (b and c) indicate that the binding of  $\text{Hg}^{2+}$  with the probe is not reversible.

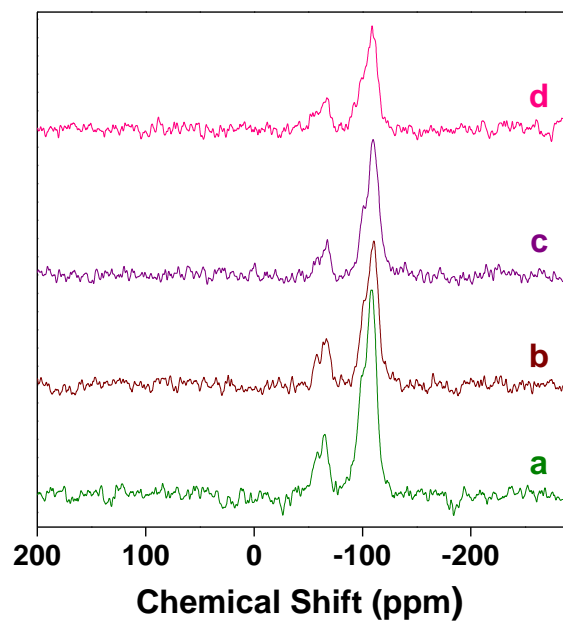

**Fig. S21.** Solid state  $^{29}\text{Si}$  MAS NMR spectra of (a) **R6FMS**, (b)  $\text{Al}^{3+}$ -**R6FMS** in ethanol, (c)  $\text{Hg}^{2+}$ -**R6FMS** in ethanol and (d)  $\text{Hg}^{2+}$ -**R6FMS** in HEPES buffer in water/acetonitrile.

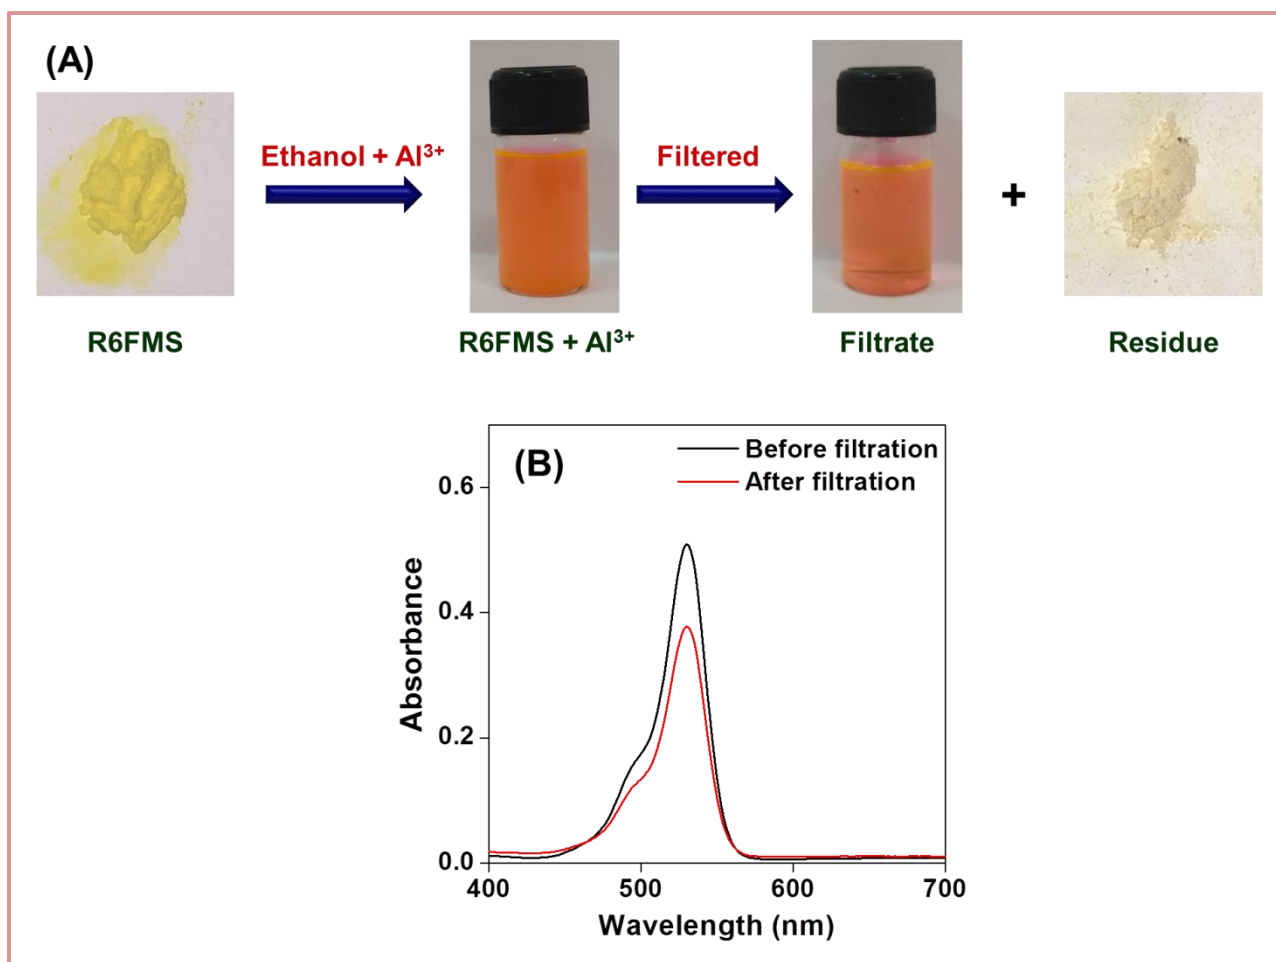

**Fig. S22.** (A) Change of color of **R6FMS** in the presence of  $\text{Al}^{3+}$  in ethanol before and after filtration and (B) Absorption spectra of **R6FMS** in the presence of  $\text{Al}^{3+}$  ion in ethanol before and after filtration.



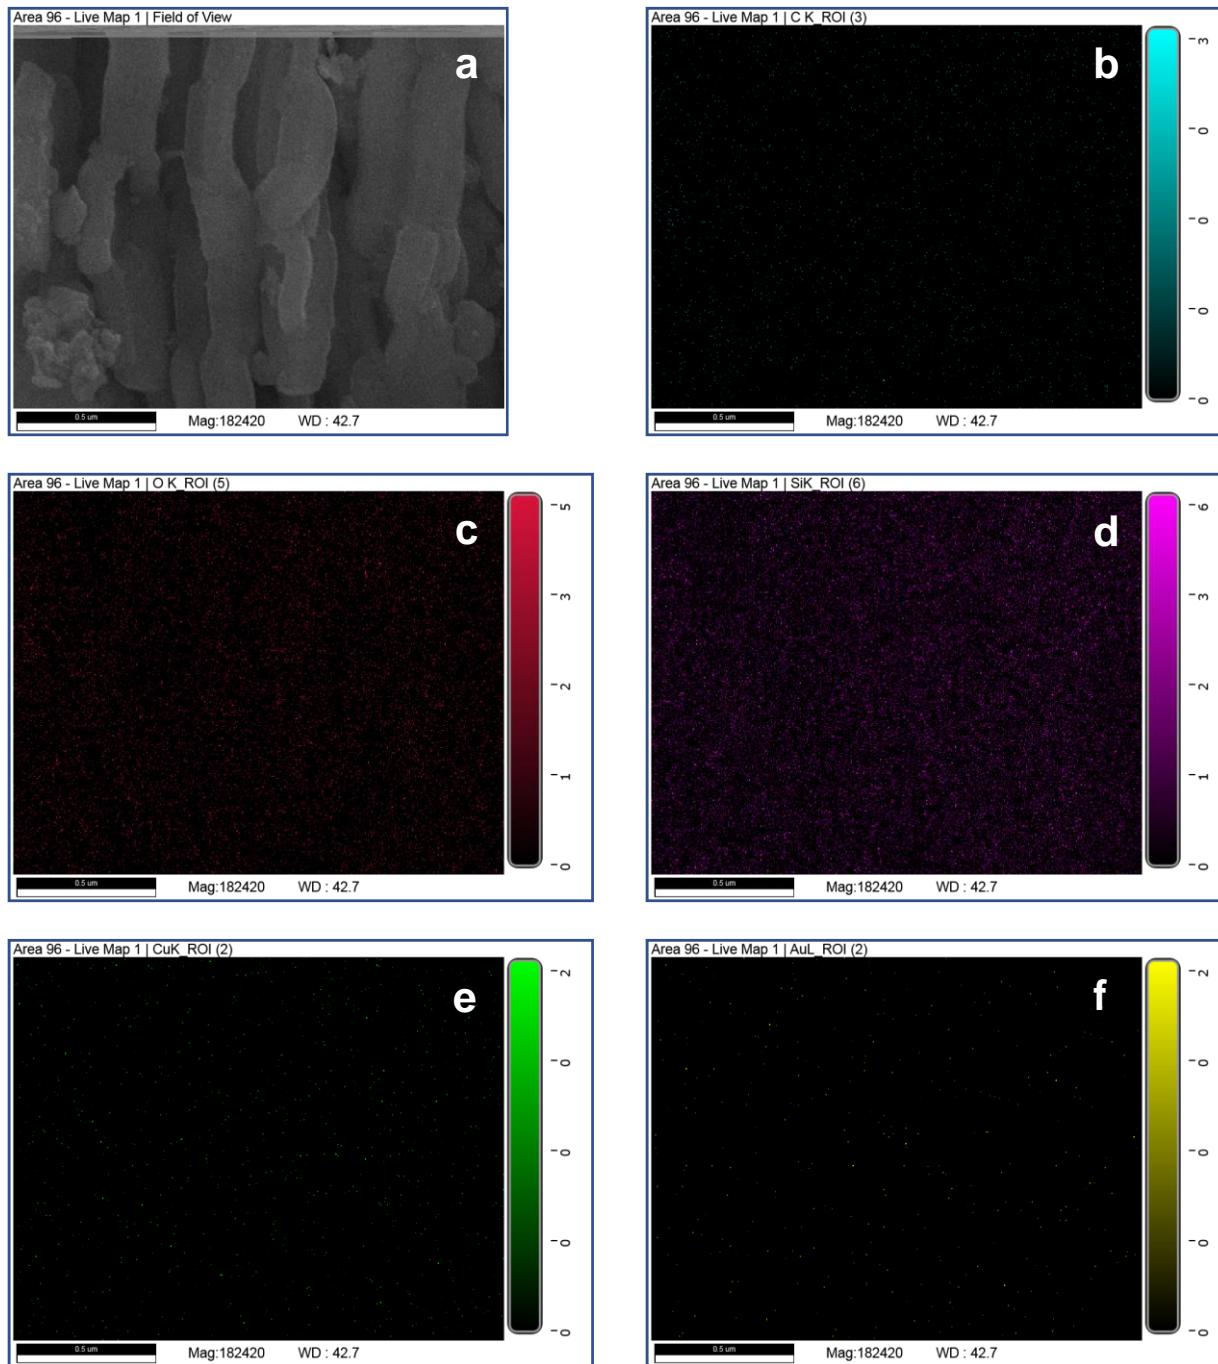

**Fig. S23.** (a) Area selected for EDS spectrum and corresponding EDS patterns showing elemental mapping in  $\text{Cu}^{2+}$ -R6FMS of (b) Carbon (cyan), (c) Oxygen (red), (d) Silicon (magenta), (e) Copper (green) and (f) Gold (yellow).

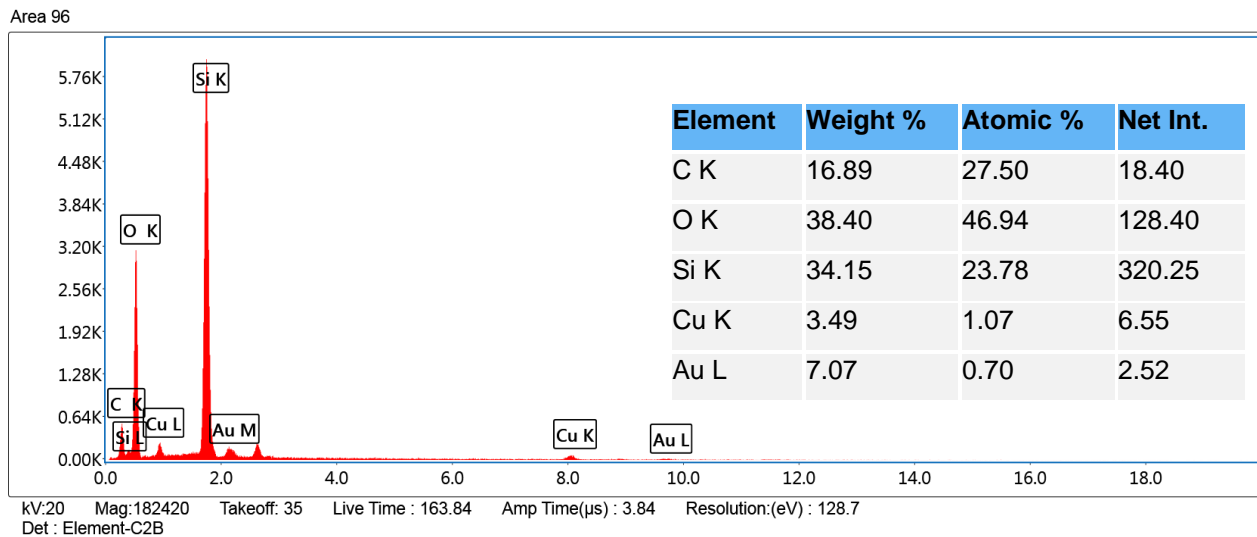

**Fig. S24.** EDS sum spectrum of  $\text{Cu}^{2+}$ -R6FMS showing the presence of the different elements on the sample surface.

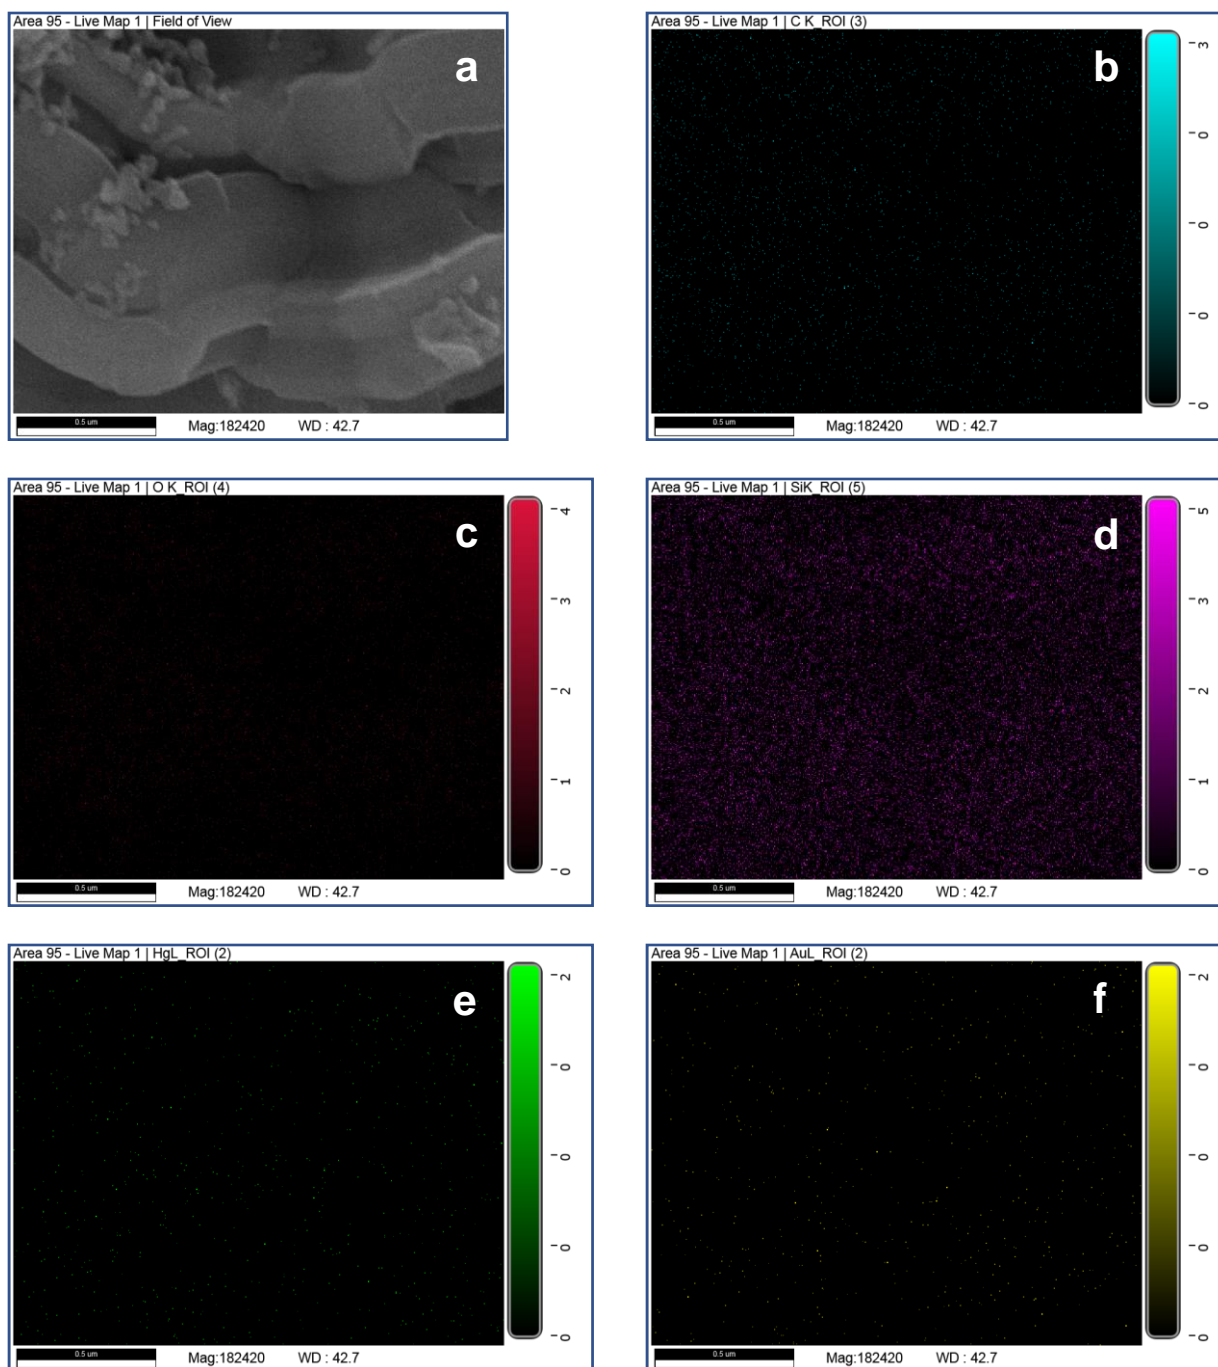

**Fig. S25.** (a) Area selected for EDS spectrum and corresponding EDS patterns showing elemental mapping in  $\text{Cu}^{2+}$ -**R6FMS** of (b) Carbon (cyan), (c) Oxygen (red), (d) Silicon (magenta), (e) Mercury (green) and (f) Gold (yellow) and (g) EDS sum spectrum of  $\text{Hg}^{2+}$ -**R6FMS** showing the presence of the different elements on the sample surface.

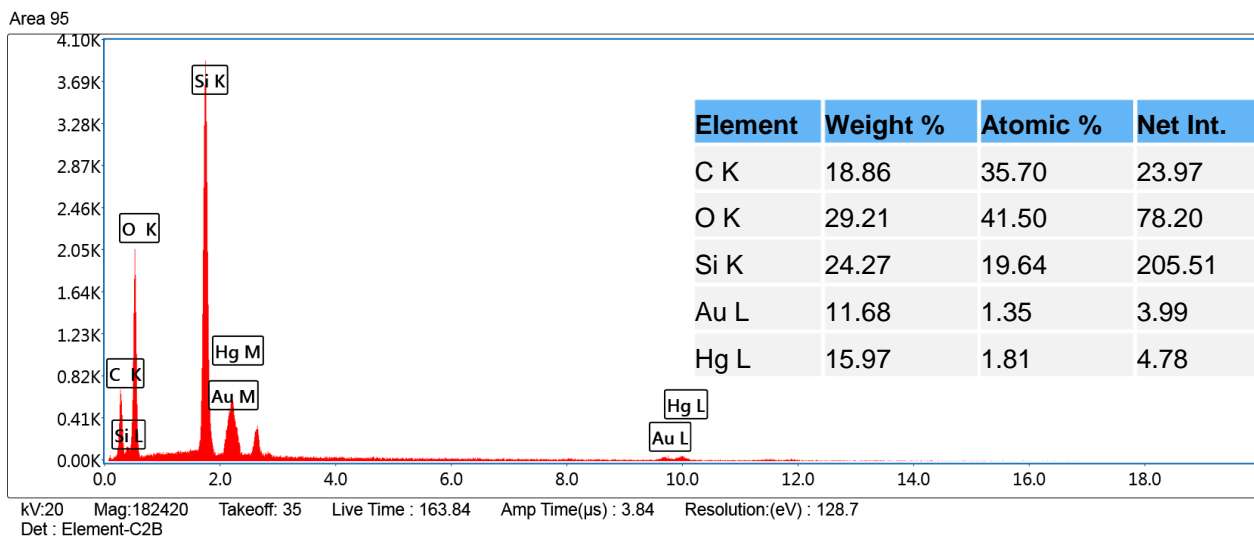

**Fig. S26.** EDS sum spectrum of  $\text{Hg}^{2+}$ -R6FMS showing the presence of the different elements on the sample surface.

**Table S1.** Solubility of different metal salts in water and ethanol at 25°C

| No. | Formula                                              | Solubility in water<br>(g/L) | Solubility in ethanol<br>(g/L) | Purchased<br>from |
|-----|------------------------------------------------------|------------------------------|--------------------------------|-------------------|
| 1.  | NaCl                                                 | 360                          | 0.65                           | Merck             |
| 2.  | MgCl <sub>2</sub>                                    | 543                          | 74                             | Merck             |
| 3.  | Al(NO <sub>3</sub> ) <sub>3</sub> ·9H <sub>2</sub> O | 739                          | 86.3                           | Merck             |
| 4.  | KCl                                                  | 339.7                        | 0.0029                         | Merck             |
| 5.  | CaCl <sub>2</sub>                                    | 811                          | 258                            | Merck             |
| 6.  | CrCl <sub>3</sub> ·6H <sub>2</sub> O                 | 585                          | ---                            | Merck             |
| 7.  | MnCl <sub>2</sub> ·4H <sub>2</sub> O                 | 739                          | 74                             | Merck             |
| 8.  | FeCl <sub>3</sub>                                    | 912                          | 830                            | Merck             |
| 9.  | CoCl <sub>2</sub> ·6H <sub>2</sub> O                 | 529                          | 86                             | Merck             |
| 10. | NiCl <sub>2</sub> ·6H <sub>2</sub> O                 | 675                          | 8                              | Merck             |
| 11. | CuCl <sub>2</sub> ·2H <sub>2</sub> O                 | 757                          | 530                            | Merck             |
| 12. | ZnCl <sub>2</sub>                                    | 4320                         | 4300                           | Merck             |
| 13. | NaAsO <sub>2</sub>                                   | 1560                         | ---                            | Merck             |
| 14. | CdCl <sub>2</sub>                                    | 1196                         | 14.8                           | Merck             |
| 15. | HgCl <sub>2</sub>                                    | 69                           | 40                             | Merck             |
| 16. | Pb(NO <sub>3</sub> ) <sub>2</sub>                    | 597                          | 87.7                           | Merck             |

**Speciation of metal ions**

Literature study suggests the following species may exist under the experimental conditions in aqueous medium

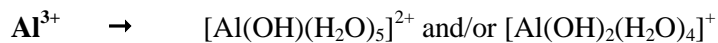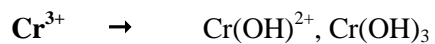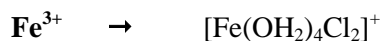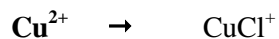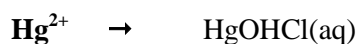

## References

1. G. Berthon, *Coord. Chem. Rev.*, 1996, **149**, 241-280.
2. R. Rakhunde, L. Deshpande and H. D. Juneja, *Crit. Rev. Env. Sci. Tec.*, 2012, **42**, 776-810.
3. S. A. Cotton, *J Coord. Chem.*, 2018, **71**, 3415-3443.
4. K. J. Powell, P. L. Brown, R. H. Byrne, T. Gajda, G. Hefter, S. Sjöberg and H. Wanner, *Pure Appl. Chem.*, 2007, **79**, 895-950.
5. K. J. Powell, P. L. Brown, R. H. Byrne, T. Gajda, G. Hefter, S. Sjöberg and H. Wanner, *Pure Appl. Chem.*, 2005, **77**, 739-800.
